# Supplementary material for: CB1 Antagonism Exerts Specific Molecular Effects on Visceral and Subcutaneous Fat and Reverses Liver Steatosis in Diet-Induced Obese Mice
Source: PubMed Central journal article supplement — Diabetes. 2010 Jan 28;59(4):926–34. doi: 10.2337/db09-1482 (PMC2844840; doi:10.2337/db09-1482), 2010-01-28
Supplement: supp_db09-1482_dc09-1482_Online_appendix.pdf [file supp_db09-1482_dc09-1482_Online_appendix.pdf]

**Supplementary Table 1.** Primers for real-time PCR

| Gene            | 5'-sense primer-3'    | 5'-antisense primer-3'     | Length of PCR products (bp) |
|-----------------|-----------------------|----------------------------|-----------------------------|
| ACC1            | acaccatgtgggagttgtg   | gctgttcctcaggetcacat       | 64                          |
| ACC2            | catggtagtggttgaagga   | cgtgtcgatcgtgttctg         | 114                         |
| CB1             | ccgcaaagatagtcccaatg  | aacccccaccagttgaac         | 48                          |
| CPT-I           | ggatctacaattcccctctgc | atcttaactgccggatccac       | 110                         |
| FAS             | ggctgcagtgaatgaattg   | ttcgtacctccttggcaaac       | 55                          |
| FAT/CD36        | aattagtagaaccgggccac  | ccaactcccaggtacaatca       | 67                          |
| G6P             | tggcctggcttattgtacct  | gtgctaagaggaagaccga        | 64                          |
| HL              | tggaatgtggggttagtggac | acttcgcagattcctccagc       | 129                         |
| HSL             | ttaccatctcacctccctgg  | accttgctgtcctgtccttc       | 96                          |
| PEPCK           | cagccagtgccccattatt   | ccaccaaagatgataccctca      | 77                          |
| PPAR $\gamma$ 2 | atcttaactgccgatccac   | aggcacttctgaaccgaca        | 69                          |
| SCD-1           | ccggagacccttagatcga   | tagectgtaaaagatttctgcaaacc | 100                         |
| SR-B1           | tccttctgtcattttctca   | gttcacccaacaaacaggc        | 86                          |
| TNF- $\alpha$   | ggcctccctctcatcagtt   | gatctgagtgtgagggtctgg      | 49                          |
| TBP             | acggcacaggactactcca   | gctgtctttgtgctcttccaa      | 77                          |
| 18S             | gtgtggggagtgatgggtg   | gcgagacagtcaaaccacg        | 60                          |

Primer pairs were designed using Primers! software and were synthesized by MWG-Biotech AG (Ebersberg, Germany). ACC, acetyl-CoA carboxylase; CB1, cannabinoid receptor 1; CPT-I, carnitine palmitoyltransferase I; FAS, fatty acid synthase; FAT/CD36, fatty acid translocase; G6P, glucose-6-phosphatase; HL, Hepatic lipase; HSL, hormone-sensitive lipase; PPAR $\gamma$ 2, peroxisome proliferator-activated receptor  $\gamma$ 2; PEPCK, phosphoenolpyruvate carboxykinase; SCD-1, stearoyl-CoA desaturase-1; SR-B1, scavenger receptor class B type I; TNF- $\alpha$ , tumor necrosis factor- $\alpha$ ; TBP, TATA box binding protein
